# Supplementary material
Source: PubMed Central journal article supplement (PMC4187702)
Supplement: JB.01359-13_zjb999093329so1.pdf [file JB.01359-13_zjb999093329so1.pdf]

Supplemental Table 1. Bacterial Strains and plasmids used in this study

|                        | Genotype                        | Comments                                                                   | Source        |
|------------------------|---------------------------------|----------------------------------------------------------------------------|---------------|
| <i>F. tularensis</i>   |                                 |                                                                            |               |
| Schu S4                | Wild-type                       | <i>F. tularensis tularensis</i>                                            | CDC           |
| BJM1068                | $\Delta fipA$                   |                                                                            | (1)           |
| BJM1069                | $\Delta fipAB$                  |                                                                            | (1)           |
| BJM1076                | $fipA^+ fipB$ CMYC              | <i>In cis</i> complement of BJM1069*                                       | (1)           |
| BJM1077                | $fipA^+ fipB$ AMYC              | <i>In cis</i> complement of BJM1069*                                       | (1)           |
| BJM1078                | $fipA^+ fipB$ CMYA              | <i>In cis</i> complement of BJM1069*                                       | (1)           |
| BJM1099                | $fipB::26AS$                    | $fipB$ with NheI site that adds Ala-Ser at amino amino 26*                 | This study    |
| BJM1100                | $fipB$ -C22A                    | $fipB$ with substitution in the lipobox motif*                             | This study    |
| BJM1103                | $fipA^+ fipB$ AMYA              | <i>In cis</i> complement of BJM1069*                                       | This study    |
| BJM1111                | $fipB::26AS, Daa-27-117$        | $fipB$ with Mip domain deleted*                                            | This study    |
| BJM1116                | $\Delta fipA$ pFLNTP6- $fipA^+$ | Episomal complement of $\Delta fipA$                                       | This study    |
| BJM1117                | pFNLTP6- $fipA^+$               | Episomal complement of wild-type                                           | This study    |
| BJM1072                | pFNLTP6                         | Wild-type vector control                                                   | This study    |
| <i>F. novicida</i>     |                                 |                                                                            |               |
| U112                   | Wild-type                       | <i>F. novicida</i>                                                         | BEI Resources |
| NR-6988                | <i>F. novicida</i> TN:: $fipA$  | Polar mutant affecting $fipB$                                              | (2).          |
| <i>E. coli</i> strains |                                 |                                                                            |               |
| JCB571                 | $dsbA$                          |                                                                            | (3)           |
| BMYZ266                | $dsbA$ pACYC184                 | vector control                                                             | This study    |
| BMYZ279                | $dsbA$ p $fipA^+$               | Episomal complement of $dsbA$ with $fipA$                                  | This study    |
| BMYZ280                | $dsbA fipB^+$                   | Episomal complement of $dsbA$ with                                         | This study    |
| BMYZ280                | $dsbA fipAB^+$                  | Episomal complement of $dsbA$ with $fipAB$                                 | This study    |
| RGP665                 | $dsbC$ , pPDI                   | $dsbC$ harbors PDI detector plasmid                                        | (4)           |
| BMYZ246                | $dsbC$ , pPDI, pACYC184         | $dsbC$ harbors PDI detector plasmid and episomal complement vector control | This study    |

|                          |                                                |                                                                                                     |            |
|--------------------------|------------------------------------------------|-----------------------------------------------------------------------------------------------------|------------|
| BMYZ247                  | <i>dsbC</i> , pPDI, <i>pdsbC</i> <sup>+</sup>  | <i>dsbC</i> harbors PDI detector plasmid and Episomal complement with <i>E. coli</i> WT <i>dsbC</i> | This study |
| BMYZ275                  | <i>dsbC</i> , pPDI, <i>pfipB</i> <sup>+</sup>  | <i>dsbC</i> harbors PDI detector plasmid and episomal complement with <i>fipB</i>                   | This study |
| BMYZ276                  | <i>dsbC</i> , pPDI, <i>pfipA</i> <sup>+</sup>  | <i>dsbC</i> harbors PDI detector plasmid and Episomal complement with <i>fipA</i>                   | This study |
| BMYZ277                  | <i>dsbC</i> , pPDI, <i>pfipAB</i> <sup>+</sup> | <i>dsbC</i> harbors PDI detector plasmid and Episomal complement with <i>fipAB</i>                  | This study |
| <i>Plasmids</i>          |                                                |                                                                                                     |            |
| pMP815                   |                                                | <i>in cis</i> complement vector                                                                     | (5)        |
| pFNLTP6- <i>groE-gfp</i> |                                                | Plasmid used for episomal complementation in <i>F. tularensis</i>                                   | (6)        |
| pAQ207                   | <i>fipA</i> <sup>+</sup> <i>fipB</i> AMYA      | <i>fipA</i> <sup>+</sup> <i>fipB</i> AMYA in pMP815 for <i>in cis</i> complement                    | This study |
| pAQ208                   | <i>fipB</i> 26AS,Daa-27-117                    | <i>fipB</i> 26AS,Daa-27-117 in pMP815 for <i>in cis</i> complement"                                 | This study |
| pAQ226                   | <i>fipB</i> Daa236-365                         | <i>fipB</i> Daa236-365 in pMP815 for <i>in cis</i> complement                                       | This study |
| pAQ237                   | <i>fipB</i> C22A                               | <i>fipB</i> C22A in pMP815 for <i>in cis</i> complement                                             | This study |
| pACYC184                 | Chloramphenicol, tetracycline resistant        | Low copy plasmid                                                                                    | (7)        |
| pPDI detector            | pBR322 <i>bla</i> S81C, T108C                  | pPDI detector                                                                                       | (4)        |
| pBMMR199                 | <i>fipAB</i> in pACYC184                       |                                                                                                     | This study |
| pBMMR200                 | <i>fipB</i> in pACYC184                        |                                                                                                     | This study |
| pBMMR251                 | <i>fipA</i> in pACYC184                        |                                                                                                     | This study |

\* All *in cis* complementation were integrated at the *blaB* locus with wild-type *fipA* and the native promoter

## REFERENCES

1. **Qin A, Scott DW, Rabideau MM, Moore EA, Mann BJ. 2011.** Requirement of the CXXC Motif of Novel Francisella Infectivity Potentiator Protein B FipB, and FipA in Virulence of *F. tularensis* subsp. *tularensis*. PLoS One **6**:e24611.
2. **Gallagher LA, Ramage E, Jacobs MA, Kaul R, Brittnacher M, Manoil C. 2007.** A comprehensive transposon mutant library of *Francisella novicida*, a bioweapon surrogate. Proc Natl Acad Sci U S A **104**:1009-1014.
3. **Bardwell JC, McGovern K, Beckwith J. 1991.** Identification of a protein required for disulfide bond formation in vivo. Cell **67**:581-589.

4. **Ren G, Bardwell JC. 2011.** Engineered pathways for correct disulfide bond oxidation. *Antioxid Redox Signal* **14**:2399-2412.
5. **LoVullo ED, Molins-Schneekloth CR, Schweizer HP, Pavelka MS, Jr. 2009.** Single-copy chromosomal integration systems for *Francisella tularensis*. *Microbiology* **155**:1152-1163.
6. **Maier TM, Havig A, Casey M, Nano FE, Frank DW, Zahrt TC. 2004.** Construction and characterization of a highly efficient *Francisella* shuttle plasmid. *Appl Environ Microbiol* **70**:7511-7519.
7. **Chang AC, Cohen SN. 1978.** Construction and characterization of amplifiable multicopy DNA cloning vehicles derived from the P15A cryptic miniplasmid. *J Bacteriol* **134**:1141-1156.

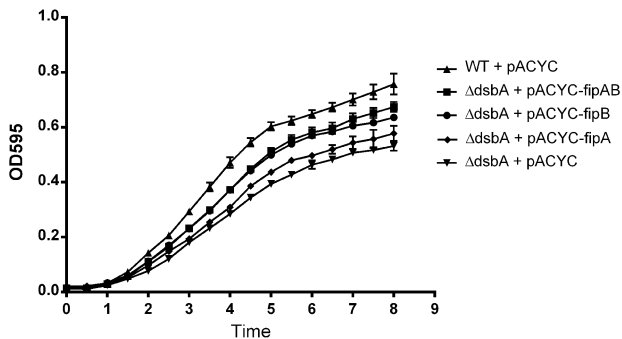

**SUPPLEMENTAL FIG 1** Growth Curves of *E. coli* strains expressing pACYC187 plasmids. Overnight cultures were diluted 1:100 in LB plus 35  $\mu\text{g/ml}$  of chloramphenicol and grown at 37° with aeration.

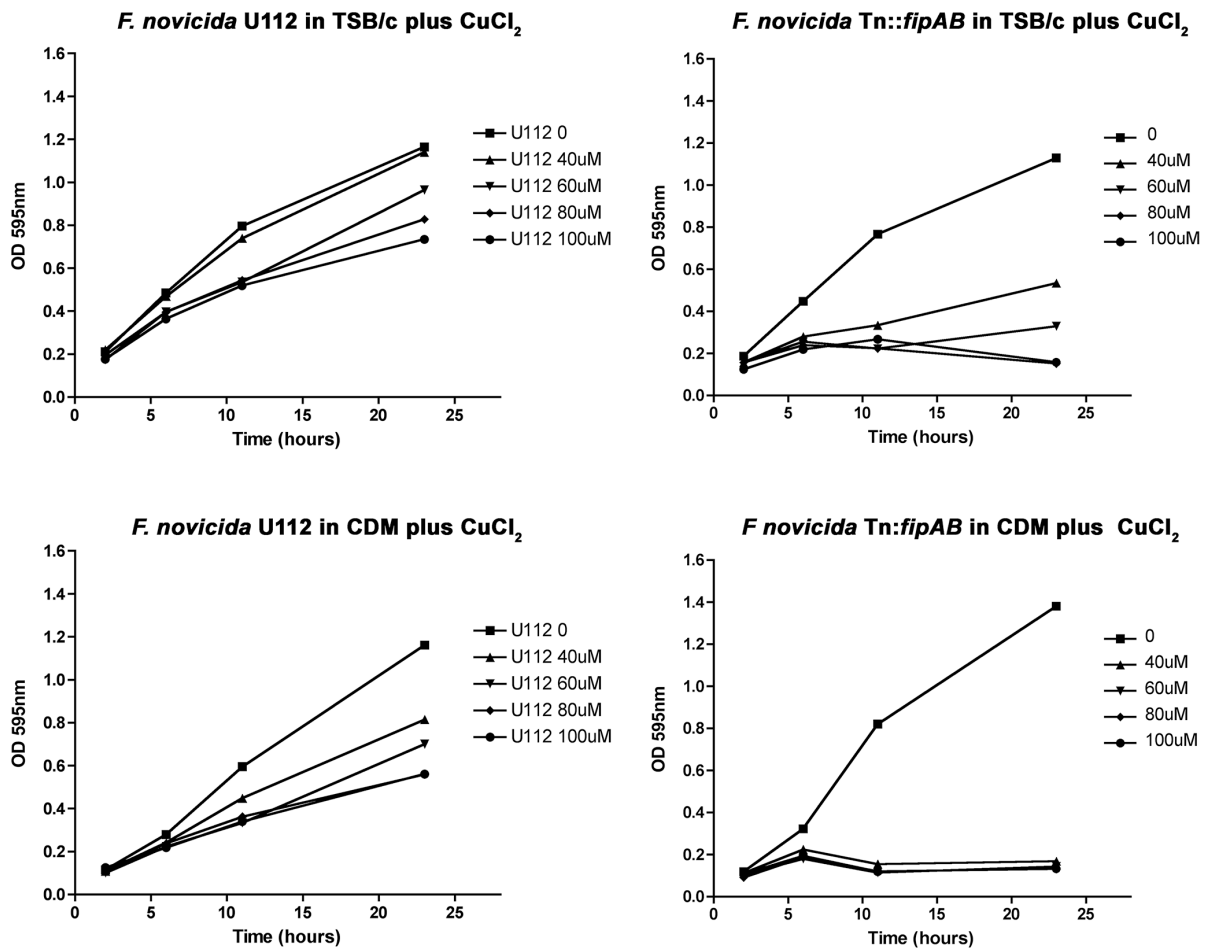

**SUPPLEMENTAL FIG 2** *F. novicida* *fipAB* mutant is more sensitive to copper than wild-type. Bacteria were grown at 37°C with shaking in the indicated media supplemented with increasing amounts of CuCl<sub>2</sub>.

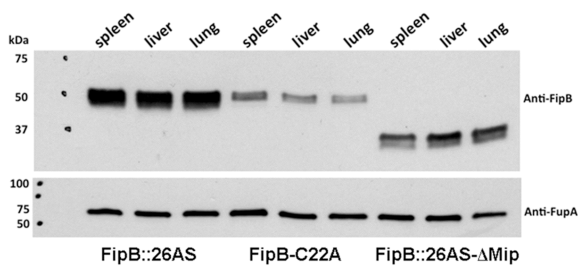

**SUPPLEMENTAL FIG 3** Mice that succumbed to infection with strains expressing mutated *fipB* were not infected with cultures that were contaminated with wild-type bacteria. Western blot of FipB from bacteria recovered from the organs of mice that succumbed to infection with the indicated strains. Mice were intranasally challenged with indicated strains, and then euthanized at the first signs of irreversible mortality. Anti-FupA antibody was used as a loading control.
